# Supplementary material for: Protection of mice deficient in mature B cells from West Nile virus infection by passive and active immunization
Source: PubMed Central journal article supplement (PMC5720816; doi:10.1371/journal.ppat.1006743), 2017-11-27

# S1 Fig.

## A

B cells gate

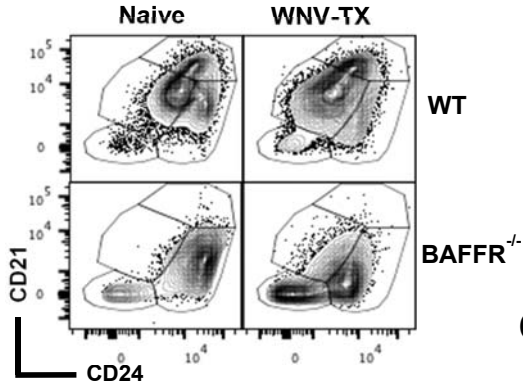

MZ-T2 gate

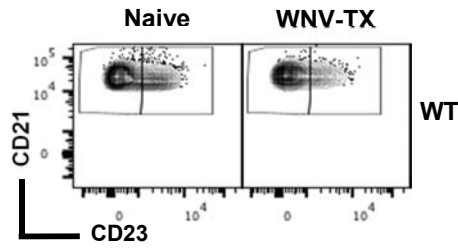

## B

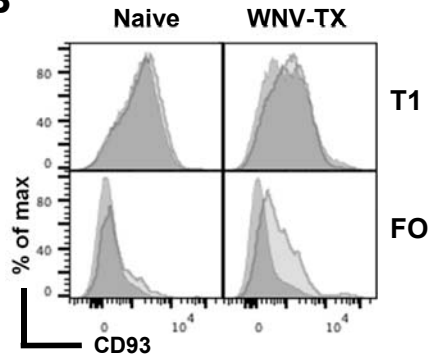

## C

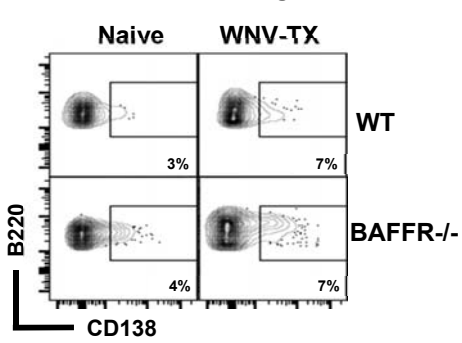

## D

Legend for D and E:

- WT naive (white bar)
- BAFFR<sup>-/-</sup> naive (hatched bar)
- WT WNV (black bar)
- BAFFR<sup>-/-</sup> WNV (grey bar)

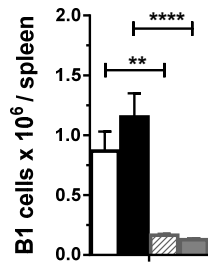

## E

Peritoneal Cavity

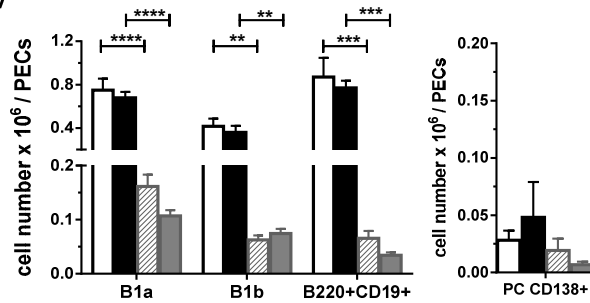

Supplement: ppat.1006743.s001.pdf [file ppat.1006743.s001.pdf]
