# Supplementary material for: Protection of mice deficient in mature B cells from West Nile virus infection by passive and active immunization
Source: PubMed Central journal article supplement (PMC5720816; doi:10.1371/journal.ppat.1006743), 2017-11-27

**S4 Fig.**

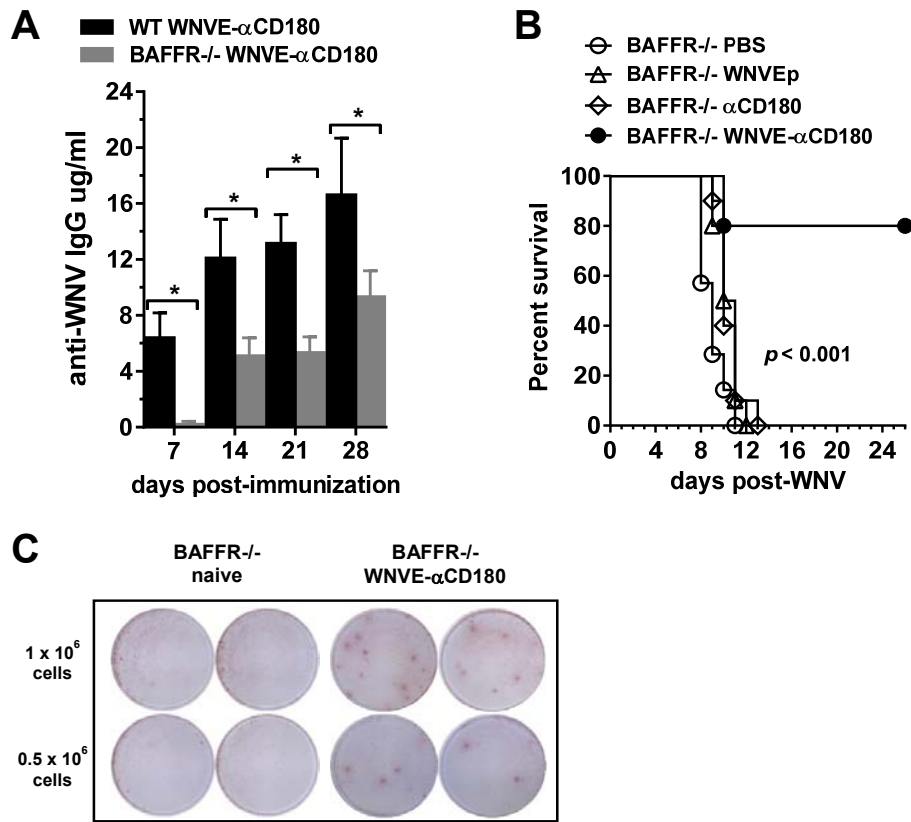

Supplement: ppat.1006743.s004.pdf [file ppat.1006743.s004.pdf]
